# Supplementary material for: The Relation between Domain-Specific Physical Behaviour and Cardiorespiratory Fitness: A Cross-Sectional Compositional Data Analysis on the Physical Activity Health Paradox Using Accelerometer-Assessed Data
Source: Int J Environ Res Public Health. 2020 Oct 29;17(21):7929. doi: 10.3390/ijerph17217929 (PMC7662405; doi:10.3390/ijerph17217929)
Supplement: Supplementary file 1 [file ijerph-17-07929-s001.pdf]

**Table S1.** Estimated difference in CRF levels (95% confidence intervals) associated with one-to-remaining reallocations of different behaviours during work and leisure time separately among 309 workers involved in physically demanding jobs.

| Difference in work behaviour (min/day) | Estimated difference in CRF (Physical fitness index, Harvard Step test) [95% CI] |                       |                       |                               |
|----------------------------------------|----------------------------------------------------------------------------------|-----------------------|-----------------------|-------------------------------|
|                                        | SB to remaining                                                                  | Standing to remaining | LIPA to remaining     | MVPA to remaining             |
| -30 min                                | <b>-1.37 [-2.33; -0.42]</b>                                                      | -1.34 [-2.80; 0.13]   | 2.37 [-1.53; 6.27]    | 3.07 [-0.77; 6.90]            |
| -20 min                                | <b>-0.89 [-1.51; -0.27]</b>                                                      | -0.88 [-1.84; 0.08]   | 1.46 [-0.95; 3.87]    | 1.86 [-0.47; 4.19]            |
| -10 min                                | <b>-0.43 [-0.74; -0.13]</b>                                                      | -0.43 [-0.91; 0.04]   | 0.68 [-0.44; 1.81]    | 0.86 [-0.22; 1.94]            |
| 0                                      |                                                                                  |                       |                       |                               |
| +10 min                                | <b>0.42 [0.13;0.70]</b>                                                          | 0.43 [-0.04; 0.89]    | -0.62 [-1.63; 0.40]   | -0.76 [-1.71; 0.19]           |
| +20 min                                | <b>0.82 [0.25;1.38]</b>                                                          | 0.85 [-0.08; 1.77]    | -1.18 [-3.12; 0.76]   | -1.45 [-3.26; 0.36]           |
| +30 min                                | <b>1.20 [0.36;2.04]</b>                                                          | 1.26 [-0.12; 2.64]    | -1.70 [-4.50; 1.10]   | -2.08 [-4.67; 0.52]           |
| <b>Leisure time (min/day)</b>          |                                                                                  |                       |                       |                               |
| -30 min                                | <b>2.75 [1.66;3.85]</b>                                                          | 0.48 [-2.70; 3.65]    | -0.03 [-11.83; 11.77] | <b>-15.57 [-23.12; -8.01]</b> |
| -20 min                                | <b>1.85 [1.11;2.59]</b>                                                          | 0.30 [-1.70; 2.30]    | -0.02[-6.23; 6.20]    | <b>-8.05 [-11.95; -4.14]</b>  |
| -10 min                                | <b>0.93 [0.56;1.30]</b>                                                          | 0.14 [-0.81; 1.10]    | -0.01 [-2.66; 2.65]   | <b>-3.41 [-5.06; -1.75]</b>   |
| 0                                      |                                                                                  |                       |                       |                               |
| +10 min                                | <b>-0.95 [-1.33; -0.57]</b>                                                      | -0.13 [-1.01; 0.75]   | 0.01 [-2.13; 2.15]    | <b>2.73 [1.40; 4.05]</b>      |
| +20 min                                | <b>-1.93 [-2.70; -1.16]</b>                                                      | -0.26 [-1.96; 1.45]   | 0.01 -3.94; 3.96]     | <b>5.02 [2.58; 7.46]</b>      |
| +30 min                                | <b>-2.94 [-4.11; -1.77]</b>                                                      | -0.37 [-2.86; 2.11]   | 0.01 [-5.51; 5.54]    | <b>7.01 [3.61; 10.42]</b>     |

Abbreviations: CRF = cardiorespiratory fitness; SB = sedentary behaviour; LIPA = low intensity physical activity; MVPA= moderate-to-vigorous physical activity. Statistically significance, when 95% CI did not include zero, is marked in **bold**.

**Table S2.** Estimated difference in CRF levels (95% confidence intervals) associated with one-to-one reallocations of different behaviours during work and leisure time separately among 309 workers involved in physically demanding jobs.

| Reallocation work           | Estimated difference in CRF (Physical fitness index, Harvard Step test) |                              |                               |
|-----------------------------|-------------------------------------------------------------------------|------------------------------|-------------------------------|
|                             | 10 min                                                                  | 20 min                       | 30 min                        |
| SB to standing              | -0.30 [-1.54; 0.95]                                                     | -0.16 [-0.98; 0.67]          | -0.06 [-0.47; 0.35]           |
| SB to LIPA                  | <b>-0.82 [-1.63; -0.01]</b>                                             | <b>-1.61 [-3.14; -0.07]</b>  | <b>-2.38 [-4.57; -0.19]</b>   |
| SB to MVPA                  | <b>-0.95 [-1.87; -0.04]</b>                                             | <b>-1.85 [-3.60; -0.11]</b>  | <b>-2.72 [-5.24; -0.21]</b>   |
| Standing to SB              | 0.02 [-0.39; 0.44]                                                      | 0.01 [-0.83; 0.84]           | -0.04 [-1.30; 1.22]           |
| Standing to LIPA            | -0.77 [-1.82; 0.27]                                                     | -1.51 [-3.53; 0.51]          | -2.22 [-5.15; 0.72]           |
| Standing to MVPA            | <b>-0.91 [-1.75; -0.07]</b>                                             | <b>-1.75 [-3.36; -0.15]</b>  | <b>-2.56 [-4.86; -0.26]</b>   |
| LIPA to SB                  | 0.87 [-0.06; 1.79]                                                      | 1.81 [-0.19; 3.82]           | 2.87 [-0.43; 6.17]            |
| LIPA to standing            | 0.83 [-0.32; 1.98]                                                      | 1.75 [0.70; 4.19]            | 2.78 [-1.16; 6.72]            |
| LIPA to MVPA                | -0.06 [-1.69; 1.56]                                                     | 0.05 [-3.26; 3.36]           | 0.35[-4.78; 5.49]             |
| MVPA to SB                  | <b>1.03 [0.00; 2.06]</b>                                                | 2.19 [-0.04; 4.43]           | 3.54 [-0.15; 7.22]            |
| MVPA to standing            | <b>0.99 [0.04; 1.96]</b>                                                | <b>2.12 [0.03; 4.21]</b>     | 3.45 [-0.03; 6.91]            |
| MVPA to LIPA                | 0.24 [-1.40; 1.87]                                                      | 0.67 [-2.68; 4.02]           | 1.36 [-3.89; 6.61]            |
| <b>Reallocation leisure</b> |                                                                         |                              |                               |
| SB to standing              | 0.27 [-0.48; 1.01]                                                      | 0.55 [-0.88; 1.99]           | 0.87 [-1.21; 2.94]            |
| SB to LIPA                  | 0.37 [-1.57; 2.32]                                                      | 0.76 [-2.79; 4.31]           | 1.16 [-3.76; 6.09]            |
| SB to MVPA                  | <b>2.82 [1.59; 4.06]</b>                                                | <b>5.22 [2.97; 7.47]</b>     | <b>7.33 [4.20; 10.45]</b>     |
| Standing to SB              | -0.24 [-1.06; 0.58]                                                     | -0.46 [-2.19; 1.28]          | -0.64 [-3.42; 2.14]           |
| Standing to LIPA            | 0.12 [-2.42; 2.67]                                                      | 0.25 [-4.59; 5.10]           | 0.41 [-6.62; 7.44]            |
| Standing to MVPA            | <b>2.57 [1.27; 3.87]</b>                                                | <b>4.71 [2.24; 7.18]</b>     | <b>6.57 [2.96; 10.18]</b>     |
| LIPA to SB                  | -0.36 [-2.82; 2.10]                                                     | -0.72 [-6.55; 5.12]          | -1.06 [-12.29; 10.17]         |
| LIPA to standing            | -0.11 [-3.10; 2.88]                                                     | -0.21 [-7.04; 6.62]          | -0.31 [-12.96; 12.33]         |
| LIPA to MVPA                | 2.45 [-0.89; 5.78]                                                      | 4.45 [-2.93; 11.83]          | 6.15 [-7.16; 19.45]           |
| MVPA to SB                  | <b>-3.50 [-5.06; -1.94]</b>                                             | <b>-8.22 [-11.94; -4.50]</b> | <b>-15.82 [-23.10; -8.54]</b> |
| MVPA to standing            | <b>-3.25 [-4.80; -1.69]</b>                                             | <b>-7.72 [-11.37; -4.07]</b> | <b>-15.07 [-22.16; -7.99]</b> |
| MVPA to LIPA                | <b>-3.14 [-6.27; -0.01]</b>                                             | <b>-7.51 [-14.01; -1.02]</b> | <b>-14.77 [-25.73; -3.82]</b> |

Abbreviations: CRF = cardiorespiratory fitness; SB = sedentary behaviour; LIPA = low intensity physical activity; MVPA = moderate-to-vigorous physical activity. Statistically significance, when 95% CI did not include zero, is marked in **bold**.
